# Familiarity Breeds Contempt: Kangaroos Persistently Avoid Areas with Experimentally Deployed Dingo Scents

Michael H. Parsons<sup>1,2\*</sup>, Daniel T. Blumstein<sup>3</sup>

**1** Centre for Ecosystem Diversity and Dynamics (CEDD), Department of Environmental Biology, Curtin University, Perth, Western Australia, Australia, **2** School of Veterinary Biology and Biomedical Sciences, Murdoch University, Murdoch, Western Australia, Australia, **3** Department of Ecology and Evolutionary Biology, University of California Los Angeles, Los Angeles, California, United States of America

## Abstract

**Background:** Whether or not animals habituate to repeated exposure to predator scents may depend upon whether there are predators associated with the cues. Understanding the contexts of habituation is theoretically important and has profound implication for the application of predator-based herbivore deterrents. We repeatedly exposed a mixed mob of macropod marsupials to olfactory scents (urine, feces) from a sympatric predator (*Canis lupus dingo*), along with a control (water). If these predator cues were alarming, we expected that over time, some red kangaroos (*Macropus rufous*), western grey kangaroos (*Macropus fuliginosus*) and agile wallabies (*Macropus agilis*) would elect to not participate in cafeteria trials because the scents provided information about the riskiness of the area.

**Methodology/Principal Findings:** We evaluated the effects of urine and feces independently and expected that urine would elicit a stronger reaction because it contains a broader class of infochemicals (pheromones, kairomones). Finally, we scored non-invasive indicators (flight and alarm stomps) to determine whether fear or altered palatability was responsible for the response. Repeated exposure reduced macropodid foraging on food associated with 40 ml of dingo urine,  $X = 986.75 \pm 3.97$  g food remained as compared to the tap water control,  $X = 209.0 \pm 107.0$  g ( $P < 0.001$ ). Macropodids fled more when encountering a urine treatment,  $X = 4.50 \pm 2.08$  flights, as compared to the control,  $X = 0$  flights ( $P < 0.001$ ). There was no difference in effect between urine or feces treatments ( $P > 0.5$ ). Macropodids did not habituate to repeated exposure to predator scents, rather they avoided the entire experimental area after 10 days of trials ( $R^2 = 83.8$ ;  $P < 0.001$ ).

**Conclusions/Significance:** Responses to urine and feces were indistinguishable; both elicited fear-based responses and deterred foraging. Despite repeated exposure to predator-related cues in the absence of a predator, macropodids persistently avoided an area of highly palatable food. Area avoidance is consistent with that observed from other species following repeated anti-predator conditioning. However, this is the first time this response has been experimentally observed among medium or large vertebrates – where a local response is observed spatially and an area effect is revealed over time.

**Citation:** Parsons MH, Blumstein DT (2010) Familiarity Breeds Contempt: Kangaroos Persistently Avoid Areas with Experimentally Deployed Dingo Scents. PLoS ONE 5(5): e10403. doi:10.1371/journal.pone.0010403

**Editor:** Frederick R. Adler, University of Utah, United States of America

**Received:** January 24, 2010; **Accepted:** April 8, 2010; **Published:** May 5, 2010

**Copyright:** © 2010 Parsons, Blumstein. This is an open-access article distributed under the terms of the Creative Commons Attribution License, which permits unrestricted use, distribution, and reproduction in any medium, provided the original author and source are credited.

**Funding:** This research was part-supported by the Australian Research Council (LPO776652; <http://www.arc.gov.au>), the Rural Industries Research and Development Corporation (RIRDC PRJ000676; <http://www.rirdc.gov.au>), and the Minerals and Energy Resources Institute of Western Australia (MERIWA M394; <http://www.doir.wa.gov.au/meriwa>) sponsored by Barrick Gold, Iluka Resources and the WA Chemistry Centre. Except as described, funders had no role in study design, data collection and analysis, decision to publish, or preparation of the manuscript.

**Competing Interests:** Dr. Michael Parsons declares a competing interest on behalf of himself, sponsor Chemistry Centre WA, Ms. Carol Lander and Mr. Warren Potts (both acknowledged in the paper). The authors have applied for an Australian patent (AU-2007202833) based on their findings.

\* E-mail: M.Parsons@Murdoch.edu.au

## Introduction

Many animals assess risk from intra-specific scent cues left behind by potential predators. Sulfur containing chemicals, volatile fatty acids and ketones (all diet released metabolites) may cause the repellent properties of predator urine and feces [1]. However, urine and anal scent gland exudates also contain a broad class of infochemicals [2], including steroid alcohols and carrier proteins, that may synergistically indicate the: reproductive status [3], territorial status [4], age [5] social and nutritional status [6], and a time-stamp of an animal's presence (time since void/excretion) [7]. These complex properties likely evolved to assist intra-specific communication without alerting potential prey to the

predator's presence. However, heterospecific eavesdropping, where potential prey species respond to such predator-secreted olfactory cues, has been demonstrated in invertebrates [8], fish [9], amphibians [10], birds [11], and mammals [12]. Animals can also discriminate urine from closely related species. For instance, foraging beavers (*Castor fiber*) respond to odors from the wolf (*Canis lupus*), but not dogs (*Canis familiaris*; [13]). Similarly, western grey kangaroos (*Macropus fuliginosus*) can discriminate between urine from a coyote (*Canis latrans*) and dingo (*Canis lupus dingo*; [14]). However, less is known about the chemical composition and stability of the messages contained within predator wastes, and this knowledge gap makes assessing the use of chemical cues as foraging deterrents difficult. For instance, there are extensive

debates on the mechanism for deterrence [15], the time to habituation [16], and the likelihood of using this technology to train orphaned or predator naïve animals to avoid predators when re-introduced into the wild [17].

Prey may habituate (decline in responsiveness over repeated exposure) to the presence of the cue when not accompanied by the predator. For instance, bank voles (*Clethrionomys glareolus*) avoided areas with least weasel (*Mustela nivalis*) scent the most on the first day of a multi-day trail [18]. Goats (*Capra hircus*) habituated to tiger (*Panthera tigris*) feces as early as the third trial following repeated exposure [19]. Cape ground squirrels (*Xerus inauris*) quickly habituate to odors from black backed jackals (*Canis mesomelas*; [16] while mountain beavers (*Aplodontia rufa*) rapidly habituate to synthetic predator scents [20]. Even invertebrates have the ability to habituate; isopods habituate to sunfish (*Lepomis megalotis*) chemicals in 3 days [21].

Nonetheless, the presence of predator scents may influence patch selection [22], particularly when critical resources aren't being guarded [23]. Vilhunen [24] found that Arctic charr (*Salvelinus alpinus*) exposed only four times to cues from predatory pikeperch (*Sander lucioperca*) increased their spatial avoidance to pikeperch. Mongolian gerbils (*Meriones unguiculatus*; [25]), bank voles (*C. glareolus*; [26]), European hedgehog (*Erinaceus europaeus*; [26]), and house mice (*Mus domesticus*; [27]), avoid cue-laden habitats following repeated exposure to predatory cues. Few studies have demonstrated that medium-sized or large mammals have abandoned cafeteria trial areas. Moose (*Alces alces*) abandoned more than 50% of experimental areas following repeated exposure to urine from wolf (*Canis lupus*) and grizzly bears (*Ursus arctos horribilis*; [28]) and goats avoided 'landscapes of fear' laced with caracal dung (*Felis caracal*) however, indirect vulnerability cues (habitat features) were associated with the response [29].

It is essential to differentiate between habituation to chemical cues and the loss of potency of an aging cue; both could lead to the observation of decreased responsiveness. Highly volatile and less volatile agents combine to form complex scents [30]. For example, Brown hyenas (*Hyaena brunnei*) paste two different scents on the same blade of grass, one dissipates within two days and one lasts a month [31]. Carnivore scents are refreshed regularly in the wild [4] and it is likely that volatiles which advertise a time component of the scent are rapidly lost [32]. If the olfactory secretion contains differentially volatile compounds, the secretion may function as a "time-stamp" [7].

Different methods to study the response to olfactory secretions have unique constraints. Giving up densities (GUD; [33]) do not provide insight into the actual mechanism for deterrence because it does not demonstrate whether fear is responsible for the deterrent effect, only that animals stopped foraging at a particular time. For instance, sheep (*Ovis aries*) avoid food near domestic dog feces (*Canis familiaris*; [34]; [35]). However, an aversive response was also observed from pig feces (*Sus domesticus*) during the same trials. The study concluded that wolf and dog feces were more heavily avoided than feces from non-predators. However carnivore feces are generally more pungent than herbivore feces, and thus dog feces may have simply been more volatile and noxious resulting in a higher level of reduced palatability. Kimball and Nolte [36] noted the common use of feces placed alongside experimental food troughs in GUD experiments, and have suggested that altered palatability is often misinterpreted as fear. And, when rabbits demonstrated a GUD response to fox, but not sheep feces, a second measure using fecal cortisol levels was necessary to characterize the response [37]. Similarly, Pyare and Berger [28] have used three escalating levels to characterize moose (*Alces alces*) response to Grizzly bear (*Ursus arctos horribilis*) urine;

vigilance, pilo-erection, and avoidance or site abandonment were all necessary to describe the complete response. Among macropodids, flight from an area [38] may be the most apparent (and useful) measure of response to threat.

Different cues from the same predators may elicit dissimilar responses. For instance, fecal odors may generate different responses than those elicited by urine and dander. Both urine and feces from wolves (*Canis lupus*) and African lions (*Panthera leo*) produce repellent effects, possibly due to sulfurous meat metabolites in both substances [34]. However, Masini et al. [39] has shown that rats were able to discriminate among fur, urine and feces from ferrets (*Mustela nigripes*); fur created the strongest defensive response. Strangely, the repellent effects of hair and dander [1] are not related to the activity of sulphurous chemicals. Sullivan [40] has shown that snowshoe hares, (*Lepus americanus*) show a highly aversive response to wolverine (*Gulo gulo*) urine, demonstrate no response to feces, and only a moderate response to anal gland scents.

We previously observed western grey kangaroos (*Macropus fuliginosus*) to be deterred from food sources using urine from a sympatric predator (dingo, *Canis lupus dingo*); we were unable to elicit similar responses from coyote (*Canis latrans*) or human urine [14]. The aim of this study was to characterize the observed effects (fear or noxious-based avoidance), to understand the effects of repeated exposure over time, and to determine whether kangaroos can discriminate between different predator cues from the same species.

## Results

Kangaroo participation dropped steadily throughout the trial period ( $R^2 = 83.8$ ;  $F_{1,9} = 46.46$ ;  $P < 0.001$ ; Figure 1). A maximum of 45 individuals participated during the first day, and by day 11, no kangaroos elected to participate in the experiment ( $X = 27.36 \pm 4.27$  individuals). There were significant increases in all between-subject effects following treatments (Table 1); MANOVA<sub>(flight)</sub>:  $F_{2,3} = 483.55$ ,  $P < 0.001$ ; MANOVA<sub>(alarm)</sub>:  $F_{2,3} = 146.98$ ,  $P < 0.001$ ; MANOVA<sub>(encroach)</sub>:  $F_{2,3} = 13.966$ ,  $P = 0.006$ ; and in the level of food remaining MANOVA<sub>(GUD)</sub>:  $F_{2,3} = 55.25$ ,  $P < 0.001$ . Participation did not vary by specific treatment:  $F_{2,3} = 6.41$ ,  $P > 0.5$ , but rather, macropodids reduced their overall participation over time.

Urine and feces generated strong effects as compared to the control for each response, though they did not differ from one another. Flight: Macropodids fled more when encountering a urine treatment,  $X = 4.50 \pm 2.08$  flights, compared to the control  $X = 0$  flights ( $P < 0.001$ ; Table 2, Figure 2). There were no detectable flight differences when encountering a fecal treatment,  $X = 6.67 \pm 3.055$  flights ( $P = 0.444$ ); the control was different to urine ( $P < 0.001$ ) and to feces ( $P < 0.001$ ). Alarm Stomps: Macropodids generated more alarm stomps when encountering a urine treatment,  $X = 3.75 \pm 2.21$  stomps, as compared to the control  $X = 0$  stomps ( $P < 0.001$ ). There were no detectable flight differences when encountering a fecal treatment,  $X = 6.00 \pm 6.92$  stomps ( $P = 1.0$ ); the control was different to both urine ( $P < 0.001$ ) and feces ( $P < 0.001$ ). Encroachment: Macropodids encroached less when encountering a urine treatment,  $X = 0$  than a control,  $X = 9.00 \pm 0.676$  encroachments ( $P = 0.002$ ), but there was no difference between feces  $X = 0.33 \pm 0.33$  and urine ( $P = 0.385$ ); the control was different to both urine ( $P < 0.001$ ) and feces ( $P < 0.001$ ). GUD: Macropodids removed less food from the trough beside the urine treatment,  $X = 986.75 \pm 3.97$  g as compared to the control trough,  $X = 209.0 \pm 107.0$  g ( $P < 0.001$ ), but there was no difference between urine and feces,  $X = 988.67 \pm 2.03$  g treatments

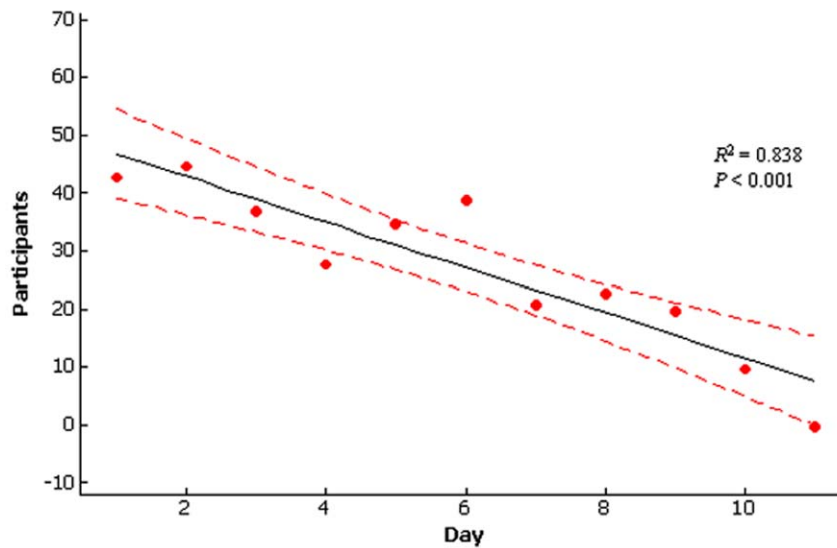

**Figure 1. Participation over time.** Participation by Western grey kangaroos (*Macropus fuliginosus*) Red kangaroos, (*Macropus rufous*) and Agile wallabies (*Macropus agilis*) attracted to trial area over a period of 11 days. doi:10.1371/journal.pone.0010403.g001

( $P=1.0$ ). The effect size of comparisons ( $d$ -scores) for each response was large between the urine and control, and between the feces and control, and negligible between urine and feces (Table 3).

## Discussion

We found that visitation to the experimental array dropped steadily throughout the trial despite the attractive foods on offer, and despite the close proximity between treatment and control troughs. Indirect cues (shelter, resources, and lack of direct experience with predators) [29] may counter the intrinsic aversion – for a time. An area effect may not become apparent until repeated exposures reinforce memory. We are unaware of any other instances where area-effects were illuminated through temporal, rather than strictly spatial, responses. This finding is in strong

contrast to expectations that animals rapidly habituate to predator cues [18;16;20]. We did not observe any habituation during these trials. This strengthens our concerns that subtle changes in chemical integrity over time [7,30] may be falsely interpreted as habituation. We previously established that novel odors such as human and coyote (*Canis latrans*) urine did not produce alarm responses from western grey kangaroos, thus subjects learned to avoid an area that contained more threatening stimuli [24], possibly because alternative natural resources were available *ad libitum* in other park areas [23].

Area avoidance is consistent with that observed following repeated anti-predator conditioning of Arctic charr (*Salvelinus alpinus*) [24]. Space use was also modified with bank voles (*Clethrionomys glareolus*) [26] and spiny mice (*Acomys spp.*) [41] in the presence of predator odors. To our knowledge, however, area avoidance (third order responses; Table 4) from predator cues has rarely been experimentally demonstrated among medium or large sized mammals exposed to predator cues in cafeteria trials.

Macropodids fed substantially less when a predatory cue was present compared to the water control. As has previously been observed [14], 68–90% of the food was taken from the trough during presentation of the tap water control, while no food was removed from the treatment troughs. Our indicators of fear, flight and alarm-stomps, were observed during all treatment periods and absent during control periods. This is not the first time that animals emitted alarm signals following presentation of an odor cue; meerkats (*Suricata suricata*) produce alarm calls following exposure to predator odor [42]. We wonder whether the alarm stomps acted synergistically in concert with the olfactory smell to increase the area of effect for congeners and conspecifics. For instance, when crayfish are exposed to a predator odour and alarm signal simultaneously, effects are increased [43]. We are confident that we have demonstrated that fear, rather than altered palatability [36], was responsible for these results.

We detected no difference in the response to dingo urine and feces; both were evocative. By contrast, dingo feces failed to produce an effect on the feeding rate of red-necked wallabies (*Macropus rufogriseus*) in an enclosure [17]. The structural integrity of the chemical cue (either frozen or fresh; [44] may have been

**Table 1. MANOVA for behavioral responses and GUD (biomass remaining) following presentation of two scent cues from the same predator.**

|                           | Response    | Sum of Squares | df | F       | P      |
|---------------------------|-------------|----------------|----|---------|--------|
| MANOVA                    | Overall     |                | 6  | 22.533  | 0.001  |
|                           | Flight      | 28.686         | 2  | 483.551 | <0.001 |
| Treatment                 | Stomps      | 26.544         | 2  | 144.981 | <0.001 |
|                           | Encroach    | 27.110         | 2  | 13.966  | 0.006  |
|                           | Biomass (g) | 8.482          | 2  | 55.245  | <0.001 |
| Participation             | Flight      | 0.060          | 1  | 2.031   | 0.204  |
|                           | Stomps      | 0.084          | 1  | 0.918   | 0.375  |
|                           | Encroach    | 0.189          | 1  | 0.195   | 0.674  |
|                           | Biomass (g) | 0.001          | 1  | 0.007   | 0.937  |
| Participation * Treatment |             | 12.81          | 2  | 0.038   | 0.963  |

doi:10.1371/journal.pone.0010403.t001

**Table 2.** Pairwise comparisons (Tukey's HSD) for behavioral responses and GUD (biomass remaining) following presentation of two scent cues from the same predator.

| Tukey's HSD  | Contrast pairs |         | P      |
|--------------|----------------|---------|--------|
| Flight       | Urine          | control | <0.001 |
|              | Urine          | feces   | 0.444  |
|              | Feces          | control | <0.001 |
| Alarm Stomps | Urine          | control | <0.001 |
|              | Urine          | feces   | 0.966  |
|              | Feces          | control | <0.001 |
| Encroachment | Urine          | control | 0.002  |
|              | Urine          | feces   | 0.385  |
|              | Feces          | control | 0.014  |
| Biomass (g)  | Urine          | control | <0.001 |
|              | Urine          | feces   | 1.000  |
|              | Feces          | control | <0.001 |

doi:10.1371/journal.pone.0010403.t002

responsible for the disparity between these different studies. We also note that some, but not all, canine feces are treated with exudates from the anal scent glands [4], thus a higher level of infochemicals may have been present in either sample.

The close proximity by which captive macropodids initially approached treatments was unexpected. Urine constituents (including pheromones) may be perceived up to 1 km from the source [7], and the olfactory capabilities of red kangaroos (*M. rufous*) have been compared to 'the sharks' ability to detect a drop of blood in water' [45]. Yet, we observed animals investigating to within 20 cm before reacting to the source cue. Animals may have been drawn to the scent by volatiles and then examined non volatiles for further information. We are also curious as to why some animals demonstrate vigilance (ears erect, pentapedal gait)

following the investigation of the source cue, but still consume food at untreated troughs a few meters away. These findings confound the traditional (spatial) notion of 'area effect'.

To maximize the value of fear based cues in rehabilitation and training contexts, further research is required to better understand: temporal and spatial interactions, cumulative effects of fear cues and microhabitat features (indirect cues), mechanisms to habituation, and the chemical stability of the signal. Due to species-specific responses to predator cues and the rarity of some natural predators, it may be necessary to artificially recreate (synthesize) active chemicals in a way that approximates the natural signal and context of application. A comparison of overlapping constituents in urine and feces (that have been treated with anal scent gland exudates) may assist identification of these compounds. Ultimately, artificial predator cues may be most useful in acute applications and are not intended to replace the ecological value of apex predators.

## Materials and Methods

Trials were carried out at the Caversham Wildlife Park (CWP; 31°85'39.5" S, 115°97'45.1" E), a commercial wildlife park 18 km N of Perth, Australia. CWP is located within a 3,600 ha conservation and leisure reserve. Seventy-two macropodid marsupials; 50 Red kangaroos (*Macropus rufous*) 20 western grey kangaroos (*Macropus fuliginis*) and 2 agile wallabies (*Macropus agilis*) inhabited a 9 ha area. There were no apparent or detectable patterns in distribution except when macropodids congregated each morning to feed in the public lawn prior to public visitation. Among the red kangaroos, there were 30 females and 20 males, ages ranged from 4 months out of the pouch to 20 yrs. There were 10 males and 10 female adult western greys whose ages ranged from 2 to 20 yrs. There was one male and one female agile wallaby; both were <2 yrs. old. The macropodids had free access to water, herbage and shrubs and all were considered healthy. Experiments were conducted in compliance with the National Health and Medical Research Council (NHMRC) of Australia's code of practice for protecting animal welfare during research and

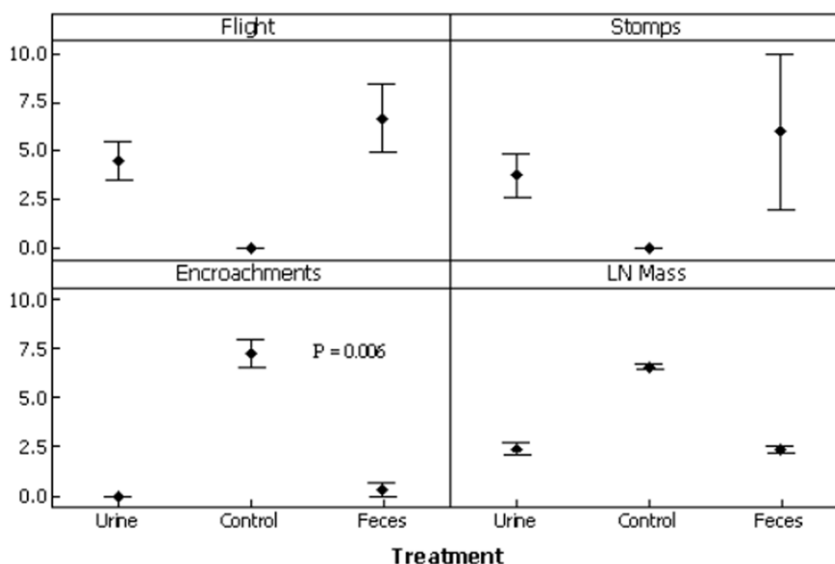

**Figure 2. Indicators of fear.** Effects of three behavioral measures ( $X \pm SEM$ ) to quantify vigilance as an indicator of fear;  $P < 0.001$  for all responses except as indicated. Y-axis is average frequency of instances for each indicator: flight, stomps, feeds from treatment trough, or LN mass removed (g). doi:10.1371/journal.pone.0010403.g002

**Table 3.** Effect size (d-scores) comparing the response of kangaroos following presentation of two scent cues (urine, feces) from the same predator.

| Dependent variable | Urine- control | Feces- control | Urine- feces |
|--------------------|----------------|----------------|--------------|
| Flight             | 2.79           | 4.00           | 2.41         |
| Stomps             | 2.18           | 1.33           | -0.75        |
| Encroachments      | -206           | -15.0          | -1.11        |
| GUD                | 6.64           | 5.93           | 0.13         |

doi:10.1371/journal.pone.0010403.t003

followed ASAB/ABS guidelines for use. The Animal Ethics permit was granted by Curtin University of Technology; AEC R68-06.

Dingo urine and feces were collected from the Australian Dingo Conservation Association (ADCA) in Michelago, NSW. Animals spent evenings housed in a concrete lined shelter where pooled evening voids drain into a central repository (1 L Schott bottles). All urine and feces were collected fresh in 1 L Schott bottles and stored at 2°C. Fecal samples are commonly frozen for predator based cafeteria trials. However, we chose not to freeze samples due to the possibility of denaturing urine ‘carrier’ proteins during the freezing process [44]. To control for the loss of signal activity over time [7;32], we staggered our order of urine and feces (fresh urine and feces arrived weekly) to keep all treatments less than six-weeks old from time of collection. We have previously been unable to elicit fearful responses (flight, alarm stomps) using domestic dog urine (unpublished data) thus, for this study, we only used samples from pure bred dingoes [46]. Animals were fed a standard diet of chicken carcasses prior to sample collection.

### Feeding trials

Cafeteria trials (Figure 3) were carried out from 27 September–6 October, 2007. The study area comprised a large grassy lawn on the eastern side of the property where 50–60 animals aggregated daily to interact and accept supplemental food from visitors. The property managers attracted the kangaroos to this area daily by offering the most palatable food one time/day (fresh breads at 6am). Two researchers were trained to follow the same feeding protocol as staff so that variations in animal participation may be attributed to treatments rather than undeclared variables. The kangaroos have followed this schedule for three years prior to our

trials. Experiments were conducted before the park was opened for visitors. We employed feeding trials at four feeding stations [14; Figure 3] selected at arbitrary intervals. Animals had equal access to all stations.

Each station consisted of a single trough filled with 1 kg whole seeded-bread broken into 5 cm cubes. Four troughs were placed at approximately 4 m intervals along a linear transect. Despite our haphazard randomization of troughs to avoid handedness from influencing where animals select food, animals did not participate equally among the four troughs. Thus, we only included levels of food remaining in the trough beside treatment or tap-water control for comparative GUD measures (N = 10; 4 urine, 3 feces and 3 controls). Treatments consisted of 40 ml of dingo urine, 40 ml of tap water, or 20 mg of feces. Volumes/mass were chosen to represent a ‘typical’ void (Barry Oakman, Australian Dingo Conservation Association, personal communication) and placed next to one of the stations in a Petri dish.

Animals were observed by two observers, 10 m away (a distance that did not interfere with the behavior of these habituated subjects), and trials were terminated after 30 min. Remaining food at each trough was collected, and weighed to the nearest g to quantify the GUD. In addition to GUD, we recorded two behavioral measures that might indicate fear: flight from the feeding station, and foot stomps—an alarm signal that may function to warn conspecifics about imminent danger [47]; [48] or to confuse predators in pursuit [49]. We also used two measures to quantify altered palatability. We previously observed that kangaroos would turn away from an odor rather than leaning over the treatment to feed. Thus, we noted instances of feeding over the treatment trough, and refer to this behavior as ‘encroachment’.

We were unable to identify individual animals; therefore, we counted the number of animals participating in the trial area at the start of each trial as a crude measure of whether habituation was occurring over time.

### Statistics

We recorded four response variables to quantify approach and avoidance responses ([50]; Table 4): the frequency of flight, the number of foot stomps, number of encroaches directly over the treatment and z scores for the amount of biomass remaining (GUD). Kangaroo participation, defined as number of animals present in the trial area at the commencement of each trial, was recorded as a covariate for all measures. We fitted a MANOVA

**Table 4.** Summary of cafeteria experiment to evaluate fear and avoidance responses among kangaroos to different dingo waste cues.

|                |                 | Inferred state | Treatments          | Covariate     |
|----------------|-----------------|----------------|---------------------|---------------|
| Variable       | Flight          | Vigilance/fear | Dingo urine         | Participation |
|                | Alarm Stomp     | Vigilance/fear | Dingo feces         |               |
|                | Encroachment    | Attraction     | Tap water           |               |
|                | Biomass removed | Attraction     |                     |               |
|                |                 | Implication    | Example of behavior |               |
| Response level | First order     | Awareness      | Ignore food         |               |
|                | Second order    | Discrimination | Flight              |               |
|                | Third order     | Avoidance      | Site abandonment    |               |

doi:10.1371/journal.pone.0010403.t004



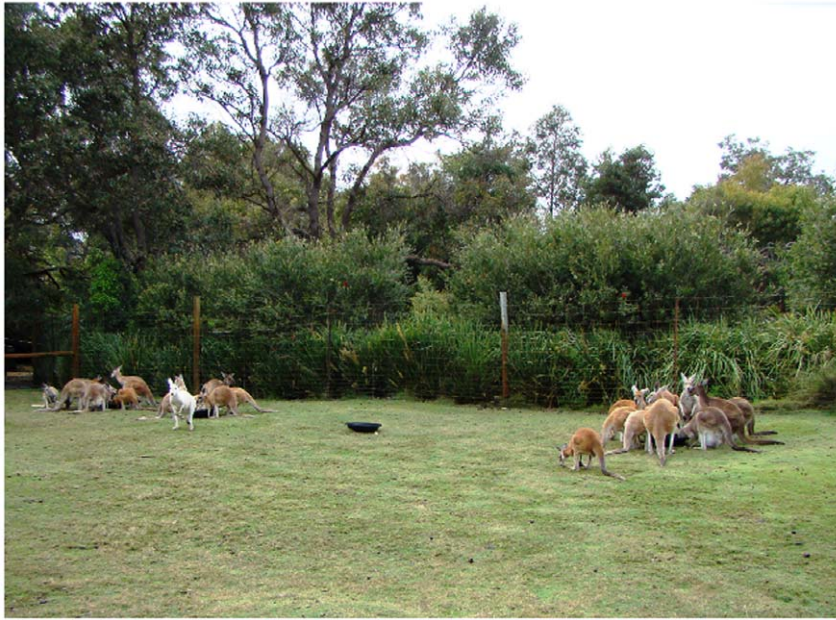

**Figure 3. Cafeteria trials.** Western grey (*Macropus fuliginosus*), red kangaroos (*Macropus rufous*) and agile wallabies (*Macropus agilis*) participating in cafeteria trials in Caversham Wildlife Park, Whiteman, WA. The treatment (dingo urine) is located beside the trough in the centre. Other treatments (feces, water) were rotated among troughs and position and differed according to day. doi:10.1371/journal.pone.0010403.g003

model in SPSS version 11.5 (SPSS Inc., Chicago, IL, U.S.A.) to all response variables. Tukey's HSD post hoc analysis was applied to within-subject treatments (e.g., urine, feces, control). A linear regression was fitted to assess whether elapsed days explained variation in participation rate. We calculated  $d$ -scores [51] to identify effect size of comparisons between treatments. All tests were two-tailed, we set our  $\alpha = 0.05$ . Means are given  $\pm$ SEM.

## Acknowledgments

We are grateful to David Thorne Sr., and David Thorne Jr. of the Caversham Wildlife Park, Carol Lander and the research staff of Roo Gully Wildlife Sanctuary, Ken Dods of the Chemistry Centre WA and

John Dawson of the Department of Primary Industries and Water's 'Alternatives to 1080 program' and Mr. Warren Potts of Glen Forrest Specialty Feeds. Faith Parsons provided statistical support and we thank Frank Rosell for astute comments on a previous version of this MS. Two anonymous reviewers offered extremely constructive comments and insights into the presentation and ramifications of our research.

## Author Contributions

Conceived and designed the experiments: MHP. Performed the experiments: MHP. Analyzed the data: MHP DTB. Contributed reagents/materials/analysis tools: MHP. Wrote the paper: MHP DTB. Post doctoral supervisor for Parsons: DTB. Assisted data analysis and writing: DTB.

## References

- Seamans TW, Blackwell BF, Cepek JD (2002) Coyote hair as an area repellent for white-tailed deer. *Int J Pest Manage* 48: 301–306.
- Burger BV (2005) Mammalian Semiochemicals. *Top Curr Chem* 240: 231–278.
- Sankar R, Archunan G (2008) Identification of putative pheromones in bovine (*Bos taurus*) faeces in relation to estrus detection. *Anim Sci* 103.
- Gorman ML, Trowbridge BJ (1989) The role of odour in the social lives of Carnivores. In: J Gittleman, ed. *Carnivore Behavior, Ecology and Evolution*. Ithaca, New York: Cornell University Press. pp 57–88.
- Erlinge S, Sandell M, Brink C (1982) Sexual differences in spatio-temporal interactions among badgers. *Anim Behav* 30: 811.
- Gelperin A (2008) Neural Computations with Mammalian Infochemicals. *J Chem Ecol* 34: 928–942.
- Wyatt TD (2003) Pheromones and animal behaviour: Communication by smell and taste. Cambridge: Cambridge University Press. 408 p.
- Kesavaraju B, Damal K, Juliano SA (2007) Threat-sensitive behavioral responses to concentrations of water-borne cues from predation. *Ethol* 113: 199–206.
- Evans JP, Gasparini C, Pilastro A (2007) Female guppies shorten brood retention in response to predator cues. *Behav Eco Sociobiol* 61: 340–353.
- Gonzalo A, Lopez P, Martin J (2007) Iberian green frog tadpoles may learn to recognise novel predators from chemical alarm cues of conspecifics. *Anim Behav* 74: 447–453.
- Goddard RD, Bowers BB, Wilson CM (2007) Eastern bluebirds *Sialia sialis* do not avoid nest boxes with chemical cues from two common nest predators. *J Avian Biol* 38: 128–131.
- Rameshkumar K, Achiraman S, Karthikeyan K, Archunan G (2008) Ability of Mice to Detect Estrous Odor in Bovine Urine: Roles of Hormones and Behavior in Odor Discrimination. *Zool Sci* 25: 349–354.
- Rosell F, Czech A (2000) Responses of foraging beavers, *Castor fiber*, to predator odours. *Wildl Biol* 6: 13–21.
- Parsons MH, Lamont BB, Kovacs BR, Davies SJF (2007) Effects of novel and historic predator urines on semi-wild western grey kangaroos. *J Wildl Manage* 71: 1225–1228.
- Nolte DL, Mason JR, Epple G, Aronov E, Campbell DL (1994) Why are predator urines aversive to prey? *J Chem Ecol* 20: 1505–1516.
- Belton LE, Ball N, Waterman JM, Bateman PW (2007) Do Cape ground squirrels (*Xerus inauris*) discriminate between olfactory cues in the faeces of predators versus non-predators? *Afr Zool* 42: 135–138.
- Blumstein DT, Mari M, Daniel JA, Ardron JG, Griffin AS, et al. (2002) Olfactory predator recognition: wallabies may have to learn to be wary. *An Conserv* 5: 87–93.
- Ylonen H, Eccard JA, Jokinen I, Sundall J (2006) Is the antipredatory response in behaviour reflected in stress measured in faecal corticosteroids in a small rodent? *Behav Ecol Sociobiol* 60: 350–358.
- Murray PJ, Burns AC, Davy JR (2006) Development of an animal repellent - selection, efficacy and presentation. *Agric* 47: 851–856.
- Epple G, Mason JR, Aronov E, Nolte DL, Hartz RA, et al. (1995) Feeding responses to predator-based repellents in the mountain beaver (*Aplodontia rufa*). *Ecol Appl* 5: 1163–1170.
- Holomuzki JR, Hatchett LA (1994) Predator avoidance costs and habituation to fish chemicals by a stream isopod. *Fresh Biol* 32: 585–592.

22. Sprague AJ, Hamilton DJ, Diamond AW (2008) Site safety and food affect movements of Semipalmated Sandpipers (*Calidris pusilla*) migrating through the upper Bay of Fundy. *Avian Conserv and Ecol* 3: 4.
23. Deecke VB, Slater PJB, Ford JKB (2002) Selective habituation shapes acoustic predator recognition in harbour seals. *Nat* 420: 171–173.
24. Vilhunen S (2005) Repeated antipredator conditioning: a pathway to habituation or to better avoidance? *J Fish Biol* 68: 25–43.
25. Agren G, Zhong Q, Zhong W (1989) Ecology and social behaviour of mongolian gerbils, *Meriones unguiculatus*, at Xilinhot, inner Mongolia, China. *An Behav* 37: 11–17.
26. Jedrzejewski W, Jedrzejewski B (1990) Effect of a predator's visit on the spatial distribution of bank voles: experiments with weasels. *Can J Zool* 68: 660–666.
27. Dickman CR (1992) Predation and habitat shift in the house mouse, *Mus domesticus*. *Ecol* 73: 313–322.
28. Pyare S, Berger J (2003) Beyond demography and delisting: ecological recovery for Yellowstone's grizzly bears and wolves. *Biol Conserv* 113: 63–73.
29. Schrader M, Brown JS, Kerley GIH, Kotler BP (2008) Do free-ranging domestic goats show 'landscapes of fear'? Patch use in response to habitat features and predator cues. *J Arid Env* 72: 1811–1819.
30. Muller-Schwarze D (2006) *Chemical Ecology of Vertebrates*. Cambridge: Cambridge University Press. 578 p.
31. Mills MGL, Gorman ML, Mills MEJ (1980) The scent marking behaviour of the brown hyaena, *Hyaena brunnea*. *Afr J Zool* 15: 240–248.
32. Rosell F, Bergan F, Parker H (1998) Scent-Marking in the Eurasian Beaver (*Castor fiber*) as a Means of Territory Defense. *J Chem Ecol* 24: 207–219.
33. Brown JS, Laundre JW, Gurung M (1999) The ecology of fear: Optimal foraging, game theory, and trophic interactions. *J Mammal* 80: 385–399.
34. Arnould C, Malosse C, Signoret J-P, Descoins C (1998) What chemical constituents from dog feces are involved in its food repellent effect in sheep? *J Chem Ecol* 24: 559–576.
35. Arnould C, Signoret J-P (1993) Sheep food repellents: Efficacy of various products, habituation, and social facilitation. *Chem Ecol* 19: 225–236.
36. Kimball BA, Nolte DL (2006) Animal tissue-based herbivore repellents: Scary odors or altered palatability? In: Feare C, Cowan DP, eds. *Advances in Vertebrate Pest Management Volume IV*. Furth, Germany: Filander. pp 59–72.
37. Monclus R, Rodel H, Palme R, Von Holst D, De Miguel J (2006) Non-invasive measurement of the physiological stress response of wild rabbits to the odour of a predator. *Chemoecol* 16: 25–29.
38. Stankowich T, Blumstein DT (2005) Fear in animals: a meta-analysis and review of risk assessment. *Proc R Soc B* 272: 2627–2634.
39. Masini CV, Sauer S, Campeau S (2005) Ferret Odor as a Processive Stress Model in Rats: Neurochemical, Behavioral, and Endocrine Evidence. *Behav Neurosci* 119: 280–292.
40. Sullivan T, Crump D (1986) Feeding responses of snowshoe hares (*Lepus americanus*) to volatile constituents of red fox (*Vulpes vulpes*) urine. *J Chem Ecol* 12: 229–239.
41. Jones M, Dayan T (2000) Foraging behaviour and microhabitat use by spiny mice, *Acomys cahirinus* and *A. russatus*, in the presence of blanchard's fox (*Vulpes cana*) odor. *J Chem Ecol* 26: 455–469.
42. Hollen LL, Manser M (2007) Persistence of alarm-call behaviour in the absence of predators: A comparison between wild and captive-born meerkats (*Suricata suricata*). *Ethol* 113.
43. Hazlett BA (1999) Responses to multiple chemical cues by the crayfish *Oreonectes virilis*. *Behav* 136: 161–177.
44. Schultz CJ (2000) Freezing method affects the concentration and variability of urine proteins and the interpretation of data on microalbuminuria. *Diab Med* 17: 7–14.
45. Hunt M, Slotnick B, Croft D (1999) Olfactory function in the red kangaroos (*Macropus rufus*) assessed using odor-cued taste avoidance. *Phys Behav* 67: 365–368.
46. Wilton AN, Steward DJ, Zafiris K (1999) Microsatellite variation in the Australian dingo. *J Heredity* 90: 108–111.
47. Blumstein DT, Daniel JA, Griffin AS, Evans CS (2000) Insular tammar wallabies (*Macropus eugenii*) respond to visual but not auditory cues from predators. *Behav Ecol* 11: 528–535.
48. Bender H (2005) Auditory stimuli as a method to deter kangaroos in agricultural and road environments [PhD]. Melbourne: University of Melbourne. 170 p.
49. Bednekoff PA (1997) Mutualism among safe, selfish sentinels: A dynamic game. *Am Nat* 150: 373–392.
50. Erhard HW, Elston DA, Davidson GC (2006) Habituation and extinction in an approach-avoidance test: An example with sheep. *App An Behav Sci* 99: 132–144.
51. Cohen J (1998) *Statistical power analysis for the behavioral sciences*. 2nd edn. Hillsdale, NJ: Lawrence Erlbaum Associates. 280 p.
